# Supplementary material for: Can ultra-thin Si FinFETs work well in the sub-10 nm gate-length region?
Source: Royal Society of Chemistry journal article supplement (doi:10.1039/d0nr09094h), 2021-01-01
Supplement: d0nr09094h1.pdf [file d0nr09094h1.pdf]

## Supporting Information

### Can ultra-thin Si FinFETs work well at the sub-10 nm gate-length region?

Shiqi Liu<sup>1</sup>, Jie Yang<sup>1</sup>, Lin Xu<sup>4</sup>, Jingzhen Li<sup>1</sup>, Chen Yang<sup>1</sup>, Ying Li<sup>1</sup>, Bowen Shi<sup>1</sup>,  
Yuanyuan Pan<sup>5</sup>, Linqiang Xu<sup>1</sup>, Jiachen Ma<sup>1</sup>, Jinbo Yang<sup>1,2,3</sup>, Jing Lu<sup>1,2,3,4\*</sup>

<sup>1</sup>State Key Laboratory for Mesoscopic Physics and Department of Physics, Peking University, Beijing 100871, P. R. China

<sup>2</sup>Collaborative Innovation Center of Quantum Matter, Peking University, Beijing 100871, P. R. China

<sup>3</sup>Beijing Key Laboratory for Magnetoelectric Materials and Devices, Peking University, Beijing 100871, P. R. China

<sup>4</sup>Key Laboratory for the Physics and Chemistry of Nanodevices and Department of Electronics, Peking University, Beijing 100871, P. R. China

<sup>5</sup>State Key Laboratory of Heavy Oil Processing, Institute of New Energy, College of Chemical Engineering, China University of Petroleum (East China), Qingdao, 266580, China

Email: [jinglu@pku.edu.cn](mailto:jinglu@pku.edu.cn)

The source and drain electrodes are symmetrically doped. In order to realize the most efficient carrier injection, the device's doping concentration needs to be optimized. The tested doping concentrations range from  $1 \times 10^{19}$  to  $5 \times 10^{19} \text{ cm}^{-3}$  (close to the experimental doping level). By comparing the transfer characteristics of the 5 nm gate-length ultra-thin Si TG FinFETs at bias voltage ( $V_{\text{bias}}$ ) of 0.64 V (see Fig. S1(a)), we finally picked the doping concentration of  $3 \times 10^{19} \text{ cm}^{-3}$  since the maximum  $I_{\text{on}}$  and the minimum subthreshold swing (SS) are both observed at this doping level. Besides, for the same ultra-thin Si TG FinFET, the  $n$ -type device outperforms its  $p$ -type counterpart, showing a  $\sim 16\%$  increase in the on-state current (see Fig. S1(b)). The better performance in the  $n$ -type device can be attributed to the higher mobility of electrons than holes, originating from the smaller effective mass  $m^*$  of electrons ( $0.12 m_0$ ) than that of holes ( $0.15 m_0$ ).

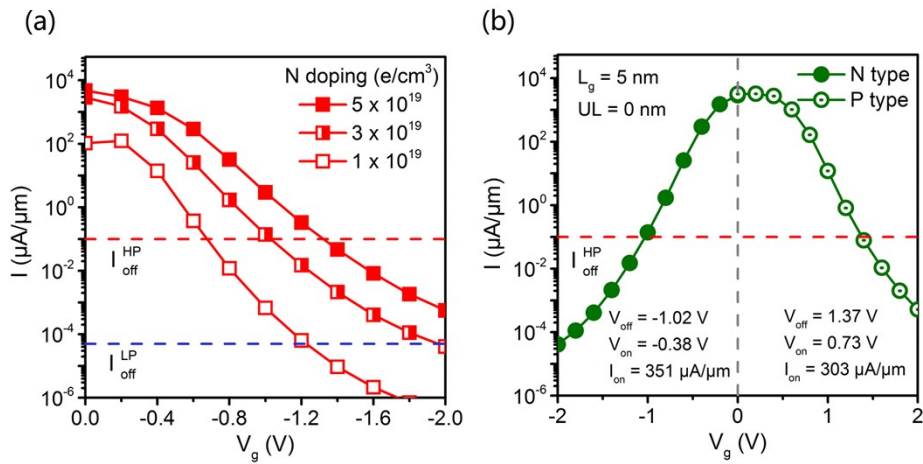

**Figure S1.** (a) Transfer characteristics of the ultra-thin Si tri-gate FinFETs for different source and drain doping concentration of electron ( $N_e$ ) at  $V_{\text{bias}}$  of 0.64 V. (b) Transfer characteristics for the  $n$ - and  $p$ -type Si tri-gate FinFETs at  $L_g = 5 \text{ nm}$  ( $UL = 0 \text{ nm}$ ) under  $V_{\text{bias}}$  of 0.64 V and doping concentration of  $3 \times 10^{19} \text{ e}/\text{cm}^3$ .
